# Supplementary material for: Synergistic photocatalytic CH4 conversion to C1 liquid products using Fe oxide species-modified g-C3N4
Source: Royal Society of Chemistry journal article supplement (doi:10.1039/d2cy00779g), 2022-01-01
Supplement: d2cy00779g1.pdf [file d2cy00779g1.pdf]

**Synergic Photocatalytic CH<sub>4</sub> Conversion to C1 liquid products using Fe species-modified g-C<sub>3</sub>N<sub>4</sub>**

*Yue Dai,<sup>a</sup> Tangtong Ju,<sup>a</sup> Hailong Tang,<sup>a</sup> Meiling Wang,<sup>a,\*</sup> Yongqing Ma,<sup>a</sup> Min*

*Wang,<sup>b,\*</sup> Ganhong Zheng<sup>a</sup> and Xiao Sun<sup>c</sup>*

<sup>a</sup>School of Materials Science and Engineering, Anhui University, Hefei, 230039,

China.

<sup>b</sup>School of Physics and optoelectronics engineering, Anhui University, Hefei, 230601,

China

<sup>c</sup>Hefei National Laboratory for Physical Sciences at the Microscale, Key Laboratory of Surface and Interface Chemistry and Energy Catalysis of Anhui Higher Education

Institutes, School of Chemistry and Materials Science, University of Science and

Technology of China, Hefei 230026, China.

\*To whom correspondence should be addressed.

Tel: (86) 13856996630, E-mail: [mlw@ahu.edu.cn](mailto:mlw@ahu.edu.cn), [ahuwm@ahu.edu.cn](mailto:ahuwm@ahu.edu.cn)

Table S1-S3 and Figure S1-S3

| Sample name                     | Fe amount [wt%] | Specific surface area [m <sup>2</sup> g <sup>-1</sup> ] | Pore Diameter [nm] |
|---------------------------------|-----------------|---------------------------------------------------------|--------------------|
| g-C <sub>3</sub> N <sub>4</sub> | 0               | 114.411                                                 | 13.99              |
| 0.5Fe                           | 0.5             | 118.789                                                 | 16.10              |
| 1Fe                             | 1               | 107.79                                                  | 7.27               |
| 2Fe                             | 2               | 96.585                                                  | 7.98               |
| 3Fe                             | 3               | 130.031                                                 | 7.36               |

Table S1. The N<sub>2</sub> adsorption-desorption isotherms for g-C<sub>3</sub>N<sub>4</sub> and Fe<sub>x</sub>-g-C<sub>3</sub>N<sub>4</sub> with different Fe contents.

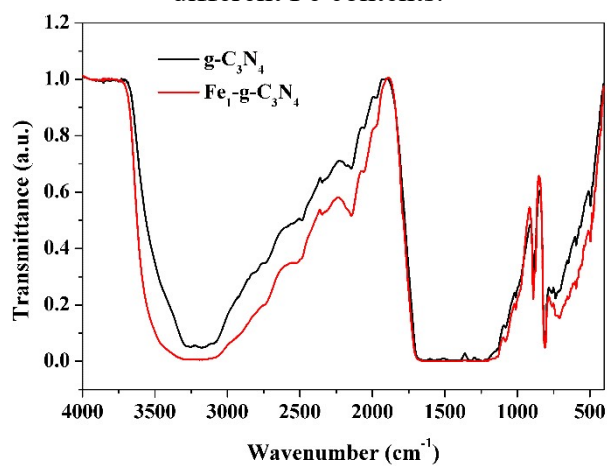

Figure S1 FTIR spectra of sample g-C<sub>3</sub>N<sub>4</sub> and Fe-g-C<sub>3</sub>N<sub>4</sub>.

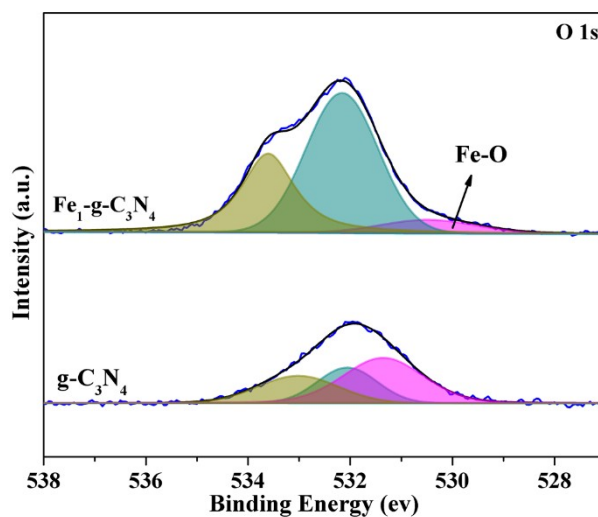

Figure S2 High resolution O1s XPS spectra of g-C<sub>3</sub>N<sub>4</sub> and Fe<sub>1</sub>-g-C<sub>3</sub>N<sub>4</sub>.

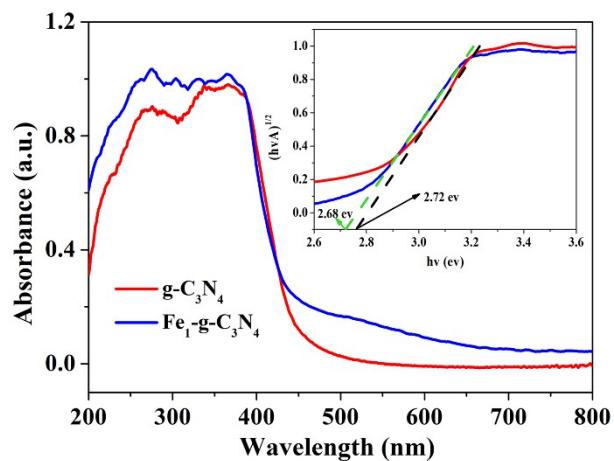

Figure S3 UV-vis spectra of Fe<sub>1</sub>-g-C<sub>3</sub>N<sub>4</sub>, inset: bandgap determination using  $[A\lambda y]^{1/2}$  vs  $h\nu$  plots.

| radical scavengers         | CH <sub>3</sub> OH | HCHO   | HCOOH  | CH <sub>3</sub> OOH | SUM of C1 products |
|----------------------------|--------------------|--------|--------|---------------------|--------------------|
| Without radical scavengers | 0.8912             | 7.4828 | 2.8369 | 3.2077              | 14.4186            |
| isopropanol                | 0.4014             | 2.4886 | 0      | 0                   | 2.89               |
| benzoquinone               | 0.4077             | 0      | 0      | 0                   | 0.4077             |

Table S2 Yields of C1 products without and with radical scavengers.
